# Supplementary material
Source: publisher site journal article supplement (https://www.dovepress.com/article/512262)
Supplement: Supplementary file 1 [file 512262%20Supplementary%20Table.docx]

**Supporting Information for**

Explainable machine learning assists in revealing associations between polysomnographic biomarkers and incident type 2 diabetes in men

Duc Phuc Nguyen1, Peter Catcheside1, Bastien Lechat1, Gary Wittert2, Andrew Vakulin1, Robert Adams1,2,3 and Sarah Appleton1,2

1 Flinders Health and Medical Research Institute-– Sleep Health (Adelaide Institute for Sleep Health), College of Medicine and Public Health, Flinders University, Bedford Park 5042, SA, Australia.

2 Freemasons Centre for Male Health and Wellbeing, Level 7, South Australian Health and Medical Research Institute (SAHMRI), Faculty of Health and Medical Sciences, The University of Adelaide, Adelaide, 5005, SA, Australia.

3 Respiratory and Sleep Service, Southern Adelaide Local Health Network, SA Health, Adelaide, SA, Australia.

Duc Phuc Nguyen

Email: [ducphuc.nguyen@flinders.edu.au](mailto:ducphuc.nguyen@flinders.edu.au)

**This file includes:**

Supporting text

Tables S1

Results

**Table S1.** **Ranking 299 biomarkers using explainable machine learning.**

| **Biomarkers** | **Rank** | **Biomarkers** | **Rank** |
| --- | --- | --- | --- |
| hr_nrem_mean_m4 | 16 | Delta_Index_derived_m4 | 63 |
| hr_rem_sd_m4 | 17 | arousal_spont_n_m4 | 64 |
| N2_Fastspindles | 18 | allapnea_index_m4 | 65 |
| money_m3 | 19 | N2_Density#min | 66 |
| BMI_m4 | 20 | centralapnea_index_nrem_m4 | 67 |
| apneahypopnea_n_nsupine_m4 | 21 | positiontransition_index_m4 | 68 |
| EEG_Absolute_REM_Theta | 22 | relativeNREM_alpha | 69 |
| allapnea_longestduration_m4 | 23 | Current smoker_m2 | 70 |
| left_pctsleeptime_m4 | 24 | allapnea_n_m4 | 71 |
| SHBG_m2 | 25 | prone_apneahypopnea_index_m4 | 72 |
| hr_recording_max_m4 | 26 | desatabs_n_lt90pct_m4 | 73 |
| hypopnea_longestduration_m4 | 27 | desat_apneahypopnea_n_61_70_m4 | 74 |
| desat_supine_meanfall_m4 | 28 | desat_total_meanfall_m4 | 75 |
| relativeNREM_delta | 29 | allapnea_meanduration_m4 | 76 |
| desat_obstructiveapnea_n_lt50_m4 | 30 | desat_apneahypopnea_n_81_90_m4 | 77 |
| n3_pcttst_m4 | 31 | wake_duration_m4 | 78 |
| desat_obstructiveapnea_n_81_90_m4 | 32 | mixedapnea_n_nsupine_m4 | 79 |
| obstructiveapnea_index_m4 | 33 | n2_pcttst_m4 | 80 |
| desat_apneahypopnea_n_total_m4 | 34 | apneahypopnea_index_m4 | 81 |
| supine_apneahypopnea_n_m4 | 35 | EEG_Absolute_NREM_Beta | 82 |
| hypopnea_n_m4 | 36 | desat_total_meanabsfall_m4 | 83 |
| n2_pctsleepperiod_m4 | 37 | hr_total_sd_m4 | 84 |
| desatabs_index_lt80pct_m4 | 38 | hr_total_max_m4 | 85 |
| mixedapnea_index_rem_m4 | 39 | desatabs_n_lt70pct_m4 | 86 |
| desat_centralapnea_n_81_90_m4 | 40 | IL-6_m2 | 87 |
| desat_mixedapnea_n_gt90_m4 | 41 | SF36_mental_component_summary | 88 |
| hr_nrem_sd_m4 | 42 | obstructiveapnea_n_rem_m4 | 89 |
| sao2_lowest_m4 | 43 | desat_mixedapnea_n_lt50_m4 | 90 |
| right_sleeptime_m4 | 44 | desat_meandesat_m4 | 91 |
| hr_nsupine_min_m4 | 45 | mixedapnea_n_nrem_m4 | 92 |
| desat_allapnea_n_71_80_m4 | 46 | hypopnea_index_m4 | 93 |
| arousal_hypopnea_index_m4 | 47 | n1_duration_m4 | 94 |
| apneahypopnea_n_supine_m4 | 48 | desat_mixedapnea_n_51_60_m4 | 95 |
| hsCRP_m2 | 49 | centralapnea_index_m4 | 96 |
| desat_mixedapnea_n_61_70_m4 | 50 | rem_pctsleepperiod_m4 | 97 |
| nsupine_apneahypopnea_n_m4 | 51 | arousal_total_n_m4 | 98 |
| allapnea_index_nrem_m4 | 52 | desat_nsupine_index_gt3pct_m4 | 99 |
| IPSS_voiding_total_m3 | 53 | hr_total_mean_m4 | 100 |
| PSQIPSQI_sleep_quality_m4 | 54 | EEG_Absolute_REM_Alpha | 101 |
| positiontransition_n_m4 | 55 | upright_sleeptime_m4 | 102 |
| centralapnea_n_rem_m4 | 56 | hypopnea_pct_m4 | 103 |
| hr_nsupine_sd_m4 | 57 | EEG_Absolute_REM_Sigma | 104 |
| desat_apneahypopnea_n_71_80_m4 | 58 | allapnea_pct_m4 | 105 |
| desat_supine_meanabsfall_m4 | 59 | sao2_time_lt80_m4 | 106 |
| desat_total_index_gt3pct_m4 | 60 | E-selectin_m2 | 107 |
| arousal_spont_index_m4 | 61 | desatabs_index_lt85pct_m4 | 108 |
| PSQI_sleep_efficiency_m4 | 62 | desat_supine_index_gt3pct_m4 | 109 |
| HDL_cholersterol_m2 | 111 | PSQI_latency_m4 | 110 |
| EEG_Absolute_REM_Beta | 112 | REM_slowing_ratio | 159 |
| desat_obstructiveapnea_n_51_60_m4 | 113 | hypopnea_n_rem_m4 | 160 |
| hr_nrem_min_m4 | 114 | rem_pcttst_m4 | 161 |
| desat_n_10_20pct_m4 | 115 | centralapnea_n_nsupine_m4 | 162 |
| PSQI_m4 | 116 | Grip strength_dominant_m2 | 163 |
| mixedapnea_n_m4 | 117 | desat_mixedapnea_n_81_90_m4 | 164 |
| Diastolic_BP_m2 | 118 | desat_obstructiveapnea_n_gt90_m4 | 165 |
| allapnea_n_supine_m4 | 119 | obstructiveapnea_index_nrem_m4 | 166 |
| desat_index_gt3pct_PN | 120 | IPSS_storage_total_m3 | 167 |
| apneahypopnea_meanduration_m4 | 121 | PSQImeds_m4 | 168 |
| left_apneahypopnea_index_m4 | 122 | hypopnea_index_nrem_m4 | 169 |
| N2_FrequencyHz | 123 | desat_index_gt4pct_PN | 170 |
| Lipid_lowering_therapy | 124 | desat_hypopnea_n_total_m4 | 171 |
| desat_allapnea_n_51_60_m4 | 125 | obstructiveapnea_n_m4 | 172 |
| Exercise_level_m2 | 126 | HBI_Index_derived_M4 | 173 |
| desat_n_lt5pct_m4 | 127 | hypopnea_n_nrem_m4 | 174 |
| allapnea_n_rem_m4 | 128 | centralapnea_n_nrem_m4 | 175 |
| mixedapnea_index_m4 | 129 | desat_apneahypopnea_n_lt50_m4 | 176 |
| Alcohol_riskM3 | 130 | obstructiveapnea_pct_m4 | 177 |
| allapnea_n_nsupine_m4 | 131 | desat_hypopnea_n_gt90_m4 | 178 |
| sao2_time_lt70_m4 | 132 | relativeNREM_beta | 179 |
| SHBG_m2_recMISSINGS | 133 | EEG_Absolute_NREM_Sigma | 180 |
| PSQIdaydys_m4 | 134 | desat_obstructiveapnea_n_61_70_m4 | 181 |
| desat_hypopnea_n_61_70_m4 | 135 | hr_nrem_max_m4 | 182 |
| SystolicBP_m2 | 136 | rem_duration_m4 | 183 |
| desat_centralapnea_n_51_60_m4 | 137 | PSQIdistb_m4 | 184 |
| supine_pctsleeptime_m4 | 138 | mixedapnea_n_rem_m4 | 185 |
| sao2_mean_nrem_m4 | 139 | hr_supine_max_m4 | 186 |
| desat_allapnea_n_total_m4 | 140 | desat_hypopnea_n_lt50_m4 | 187 |
| arousal_total_index_m4 | 141 | NREM_slowing_ratio | 188 |
| obstructiveapnea_meanduration_m4 | 142 | hr_rem_min_m4 | 189 |
| hr_nsupine_max_m4 | 143 | sao2_pcttime_lt80_m4 | 190 |
| arousal_rera_index_m4 | 144 | desat_hypopnea_n_51_60_m4 | 191 |
| desat_obstructiveapnea_n_total_m4 | 145 | desatabs_n_lt60pct_m4 | 192 |
| allapnea_index_rem_m4 | 146 | desat_centralapnea_n_lt50_m4 | 193 |
| desatabs_n_lt85pct_m4 | 147 | desat_n_gt20pct_m4 | 194 |
| apneahypopnea_n_nrem_m4 | 148 | EEG_Absolute_NREM_Theta | 195 |
| desatabs_index_lt90pct_m4 | 149 | hr_supine_min_m4 | 196 |
| relativesnoretime_m4 | 150 | desat_apneahypopnea_n_gt90_m4 | 197 |
| prone_pctsleeptime_m4 | 151 | Epworthtotal_m4 | 198 |
| right_pctsleeptime_m4 | 152 | diet_quality | 199 |
| apneahypopnea_index_rem_m4 | 153 | centralapnea_n_m4 | 200 |
| desat_centralapnea_n_gt90_m4 | 154 | right_apneahypopnea_index_m4 | 201 |
| EEG_Absolute_REM_Delta | 155 | hypopnea_n_nsupine_m4 | 202 |
| n2_duration_m4 | 156 | hr_recording_min_m4 | 203 |
| arousal_rera_n_m4 | 157 | n1_pctsleepperiod_m4 | 204 |
| snoringepisodes_n_m4 | 158 | nsupine_pctsleeptime_m4 | 205 |
| prone_sleeptime_m4 | 207 | PSQI5_m4 | 206 |
| EEG_Absolute_NREM_Delta | 208 | n3_pctsleepperiod_m4 | 255 |
| right_apneahypopnea_n_m4 | 209 | obstructiveapnea_longestduration_m4 | 256 |
| apneahypopnea_n_m4 | 210 | centralapnea_n_supine_m4 | 257 |
| desatabs_index_lt70pct_m4 | 211 | desatabs_index_lt60pct_m4 | 258 |
| N2_PowerÂµV2 | 212 | GFR_CKD_EPI_m2 | 259 |
| supine_sleeptime_m4 | 213 | desat_mixedapnea_n_71_80_m4 | 260 |
| desat_nsupine_meanfall_m4 | 214 | hr_rem_mean_m4 | 261 |
| sao2_time_lt90_m4 | 215 | desat_allapnea_n_61_70_m4 | 262 |
| hr_supine_sd_m4 | 216 | IPSS_total_m3 | 263 |
| wake_pctsleepperiod_m4 | 217 | desat_n_5_9pct_m4 | 264 |
| healthliteracy_NVStotal_m2 | 218 | desat_centralapnea_n_71_80_m4 | 265 |
| n3_duration_m4 | 219 | apneahypopnea_longestduration_m4 | 266 |
| desat_mixedapnea_n_total_m4 | 220 | supine_apneahypopnea_index_m4 | 267 |
| mixedapnea_longestduration_m4 | 221 | mixedapnea_meanduration_m4 | 268 |
| diabetes _m2 | 222 | n1_pcttst_m4 | 269 |
| Myeloperoxidase_m2 | 223 | obstructiveapnea_n_nrem_m4 | 270 |
| upright_pctsleeptime_m4 | 224 | obstructiveapnea_n_nsupine_m4 | 271 |
| Total_triglycerides_m2 | 225 | desat_nsupine_meanabsfall_m4 | 272 |
| sao2_pcttime_lt90_m4 | 226 | relativeNREM_sigma | 273 |
| desat_hypopnea_n_81_90_m4 | 227 | left_apneahypopnea_n_m4 | 274 |
| prePSG_CVD | 228 | LDL_cholesterol_m2 | 275 |
| sao2_pcttime_lt70_m4 | 229 | prone_apneahypopnea_n_m4 | 276 |
| hypopnea_n_supine_m4 | 230 | desat_allapnea_n_81_90_m4 | 277 |
| N2_Durationsec | 231 | desat_centralapnea_n_total_m4 | 278 |
| PSQI_sleep_duation_m4 | 232 | PSQIdurat_m4 | 279 |
| desat_index_5_9pct_m4 | 233 | centralapnea_pct_m4 | 280 |
| upright_apneahypopnea_n_m4 | 234 | nsupine_apneahypopnea_index_m4 | 281 |
| upright_apneahypopnea_index_m4 | 235 | desat_index_10_20pct_m4 | 282 |
| centralapnea_meanduration_m4 | 236 | desat_allapnea_n_lt50_m4 | 283 |
| obstructiveapnea_index_rem_m4 | 237 | mixedapnea_n_supine_m4 | 284 |
| relativeNREM_theta | 238 | mixedapnea_pct_m4 | 285 |
| desat_allapnea_n_gt90_m4 | 239 | desat_centralapnea_n_61_70_m4 | 286 |
| arousal_apnea_n_m4 | 240 | desat_index_gt20pct_m4 | 287 |
| Dyslipidemia_m2 | 241 | nsupine_sleeptime_m4 | 288 |
| EEG_Absolute_NREM_Alpha | 242 | arousal_hypopnea_n_m4 | 289 |
| allapnea_n_nrem_m4 | 243 | Total_cholesterol_m2 | 290 |
| hr_nsupine_mean_m4 | 244 | desat_index_lt5pct_m4 | 291 |
| apneahypopnea_index_nrem_m4 | 245 | desatabs_n_lt80pct_m4 | 292 |
| apneahypopnea_n_rem_m4 | 246 | Depressive_symptoms_meds | 293 |
| shiftwork_months_M3 | 247 | mixedapnea_index_nrem_m4 | 294 |
| arousal_apnea_index_m4 | 248 | hr_total_min_m4 | 295 |
| desat_obstructiveapnea_n_71_80_m4 | 249 | desat_apneahypopnea_n_51_60_m4 | 296 |
| obstructiveapnea_n_supine_m4 | 250 | centralapnea_index_rem_m4 | 297 |
| desat_hypopnea_n_71_80_m4 | 251 | desat_supine_n_gt3pct_m4 | 298 |
| centralapnea_longestduration_m4 | 252 | Marital_status_m3 | 299 |
| desat_total_n_gt3pct_m4 | 253 |  |  |
| sao2_mean_m4 | 254 |  |  |

M2 refers to variables collected during 2007-10 clinical assessments.

M3 refers to variables collected during a computer-assisted telephone interview in 2010.

M4 refers to variables collected by PSG or on the night of the sleep study.
